# Supplementary material
Source: PubMed Central journal article supplement (PMC7882445)
Supplement: NIHMS1668000-supplement-SI.pdf [file NIHMS1668000-supplement-SI.pdf]

## Supplementary Information

### RLDOCK: A new method for predicting RNA-ligand interaction

Li-Zhen SUN<sup>1,2,+</sup>, Yangwei JIANG<sup>2,+</sup>, Yuanzhe ZHOU<sup>2</sup>, Shi-Jie CHEN<sup>2,‡</sup>

<sup>1</sup>Department of Applied Physics, Zhejiang University of Technology, Hangzhou 310023, China

<sup>2</sup>Department of Physics, Department of Biochemistry, and Informatics Institute, University of Missouri, Columbia, MO 65211

<sup>+</sup> Authors contributed equally to this work.

<sup>‡</sup> Author to whom correspondence should be addressed; E-mail: chenshi@missouri.edu

#### 1. Born radii of atoms

In the RLDOCK model, we use a pairwise algorithm to calculate the Born radius  $B_i^{1-6}$  for an atom  $i$  in the RNA-ligand complex, RNA alone, or ligand alone,

$$\frac{1}{B_i} = \frac{1}{a_i} - \frac{1}{2} \sum_j A_j \quad (\text{S1})$$

and

$$A_j = \left( \frac{1}{L_{ij}} - \frac{1}{U_{ij}} \right) + \left( \frac{S_j^2 a_j^2}{4r_{ij}} - \frac{r_{ij}}{4} \right) \left( \frac{1}{L_{ij}^2} - \frac{1}{U_{ij}^2} \right) + \frac{1}{2r_{ij}} \ln \frac{L_{ij}}{U_{ij}}, \quad (\text{S2})$$

where

$$L_{ij} = \begin{cases} 1 & \text{if } a_i \geq r_{ij} + S_j a_j \\ \max(a_i, r_{ij} - S_j a_j) & \text{if } a_i < r_{ij} + S_j a_j \end{cases} \quad (\text{S3})$$

and

$$U_{ij} = \begin{cases} 1 & \text{if } a_i \geq r_{ij} + S_j a_j \\ r_{ij} + S_j a_j & \text{if } a_i < r_{ij} + S_j a_j \end{cases} \quad (\text{S4})$$

Here  $a_i$  and  $a_j$  denote the VDW radii of atoms  $i$  and  $j$ , respectively.  $r_{ij}$  is the distance between the atoms  $i$  and  $j$ .  $S_j$  is the structural scaling factor, and it equals to unity if there is no overlap between the atoms. Basically,  $S_j < 1$  in the RNA-ligand complex, RNA alone, or ligand alone. The value of VDW radii and structural scaling factor for various atom species are listed in Table S3

#### 2. The receiver operating characteristic curve

The receiver operating characteristic (ROC) curve can be plotted in the following way.

For each case, we select top-100 ranked poses from the prediction results of our RLDOCK model. The cases with  $\text{RMSD} < 2\text{\AA}$  are true positive (TP) and false negative (FN) cases, while those with  $\text{RMSD} > 2\text{\AA}$  are false positive (FP) and true negative (TN) cases.

For the first ROC point, we set the top 1 pose as (true or false) positive sample, and the rest 99 poses as (true and false) negative samples.

For the second ROC point, we set top 2 poses as positive samples, and the rest 98 poses as negative samples.

For the third ROC point, we set top 3 poses as positive samples, and the rest 97 poses as negative samples.

⋮

For the 99<sup>th</sup> ROC point, we set top 99 poses as positive samples, and the rest 1 pose as negative sample.

For each point, the true positive rate ( $TPR = TP/(TP+FN)$ ) and false positive rate ( $FPR = FP/(FP+TN)$ ) can be calculated and a pair of (TPR, FPR) is the coordinate of a ROC point. These 99 ROC points consists of the ROC curve, and then the area under the curve (AUC) of ROC can be calculated. The AUC is a significant indicator to show the quality of a prediction model. For example,  $AUC = 1$  shows that the top-ranked pose is a successful predicted pose ( $RMSD < 2\text{\AA}$ ) but the rest 99 poses are failed ones ( $RMSD > 2\text{\AA}$ ), while  $AUC = 0.5$  shows that the identification ability equals to random guessing. If AUC goes below 0.5, it means that successful poses are far behind failed ones in the ranking. The ROC of the three selected cases, 1FMN, 1PBR, and 1RAW are shown in Fig. S3. Moreover, the AUC values for all 230 cases used in our papers are listed in Table S8.

## References

- [1] Still,W.C., Tempczyk,A., Hawley,R.C. and Hendrickson,T. (1990) Semianalytical treatment of solvation for molecular mechanics and dynamics. *J. Am. Chem. Soc.*, **112**, 6127-6129.
- [2] Hawkins,G.D., Cramer,C.J. and Truhlar,D.G. (1995) Pairwise solute descreening of solute charges from a dielectric medium. *Chem. Phys. Lett.*, **246**, 122-129.
- [3] Zou,X., Sun,Y. and Kuntz,I.D. (1999) Inclusion of solvation in ligand binding free energy calculations using the generalized-born model. *J. Am. Chem. Soc.*, **121**, 8033-8043.
- [4] Nymeyer,H. and Garcia,A.E. (2003) Simulation of the folding equilibrium of a helical peptides: a comparison of the generalized Born approximation with explicit solvent. *Proc. Natl. Acad. Sci. U.S.A.*, **100**, 13934-13939.
- [5] Liu,H.-Y., Kuntz,I.D. and Zou,X. (2004) Pairwise GB/SA scoring function for structure-based drug design. *J. Phys. Chem. B.*, **108**, 5453-5462.
- [6] Liu,H.-Y. and Zou,X. (2006) Electrostatics of ligand binding: parameterization of the generalized Born model and comparison with the Poisson-Boltzmann approach. *J. Phys. Chem. B.*, **110**, 9304-9313.
- [7] Philips,A., Milanowska,K., Łach, G. and Bujnicki,J.M. (2013) LigandRNA: computational predictor of RNA-ligand interactions. *RNA*, **19**, 1605-1616.

(A) SASA in precise scoring function

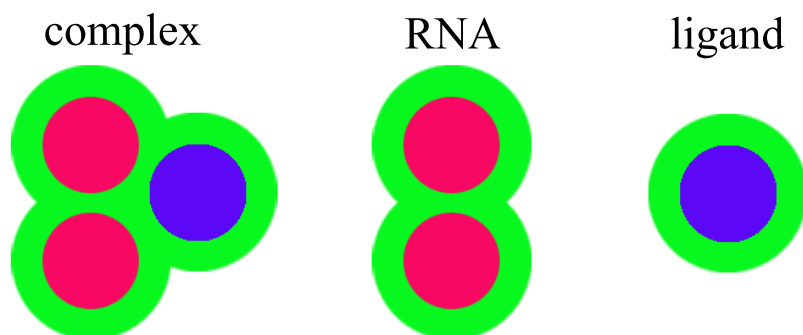

(B) SASA in simplified scoring function

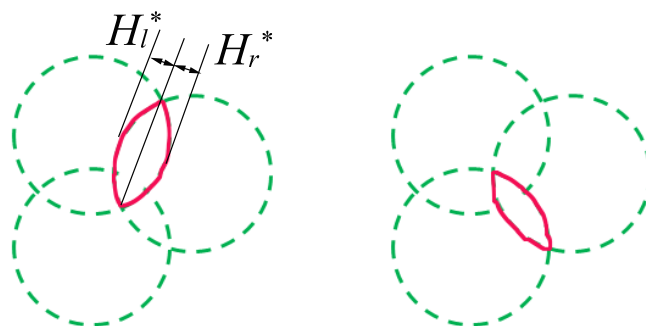

Figure S1: The 2D sketches of the solvent-accessible surface area (SASA) in the precise (A) and simplified (B) scoring functions. (A) The red and blue spheres represent the atoms in RNA and ligand. The green areas are the water shell for the RNA-ligand complex, RNA, and ligand, respectively. The outlines of the green areas are the SASA in the 2D sketch. (B) In order to clearly show the calculations in simplified scoring function, we use open rings with dash line to represent the surface of the water shell and neglect the atoms at the same time. The red lines denote the 2D outlines of the penalty SASA for overlap of two water shells.

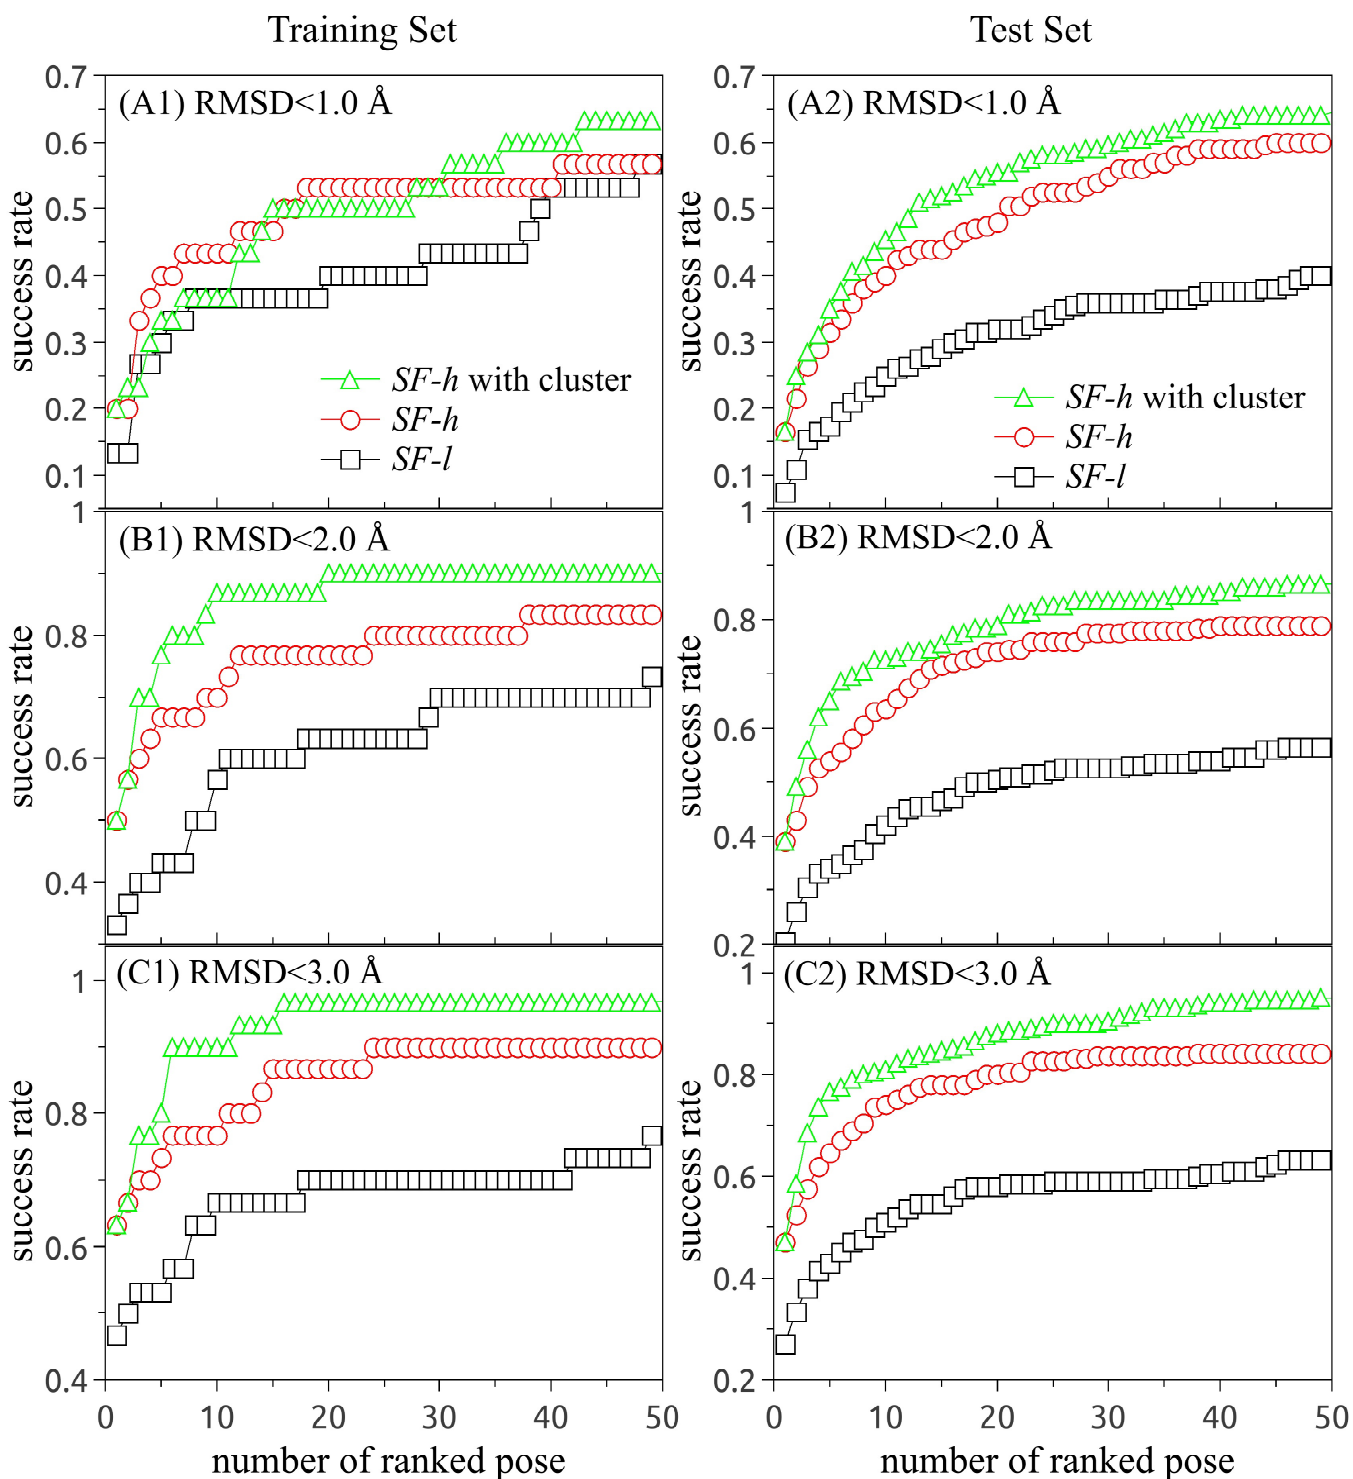

Figure S2: The success rate as a function of the number of the top-ranked poses with RMSD within 1 Å, 2 Å, and 3 Å for the training set and test set.

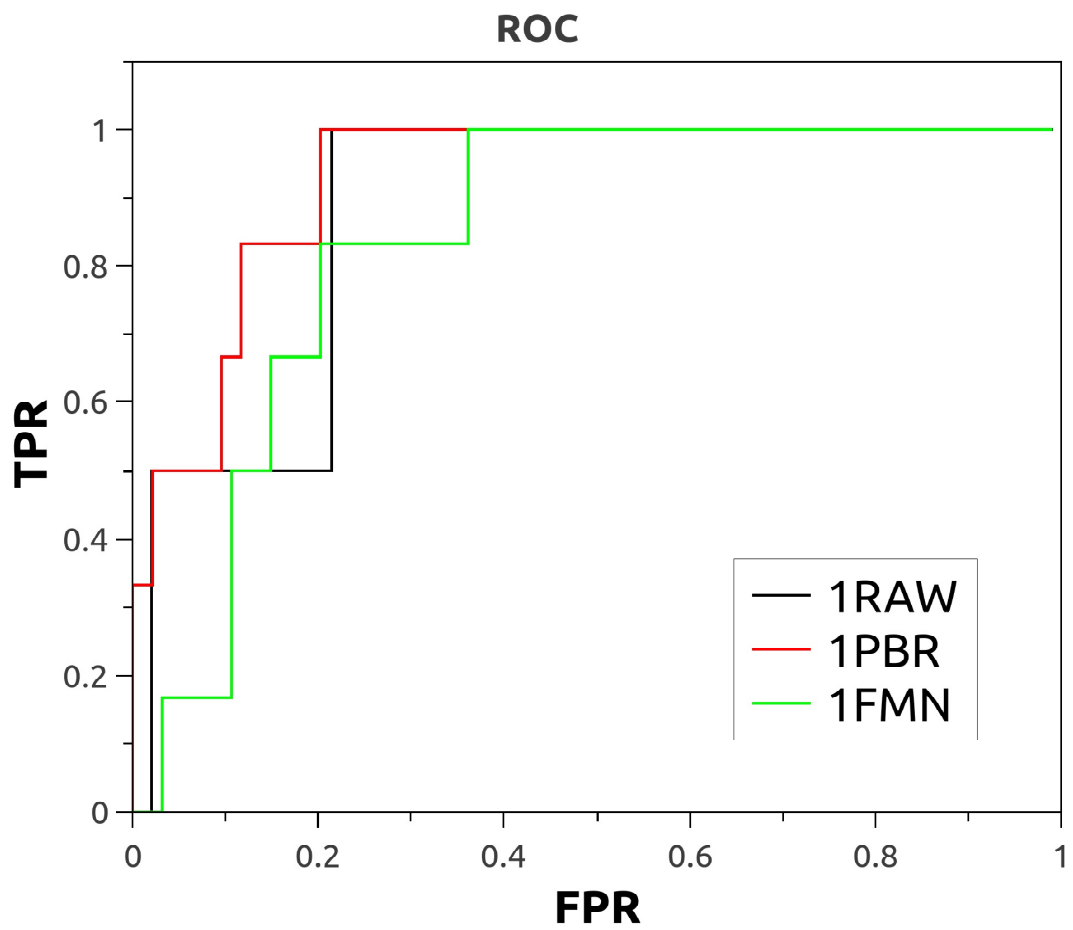

Figure S3: The ROC plots of the PDB cases with one ligand bound in Fig. 5: 1FMN, 1PBR, and 1RAW.

Table S1: List of PDBID for RNA-ligand complexes in training and test sets

| Training set |      |      |      |      |      |
|--------------|------|------|------|------|------|
| 1AKX         | 1ET4 | 1F27 | 1LVJ | 1PBR | 1J8G |
| 1KOC         | 1QD3 | 1Y26 | 2ET4 | 2FD0 | 2BE0 |
| 2BEE         | 2F4T | 2KTZ | 2O3X | 2XO1 | 3DIX |
| 3FO4         | 3GES | 3SUH | 3SUX | 3SKL | 4LVW |
| 4LW0         | 4FEJ | 4FEO | 4NYB | 4KQY | 5C45 |
| Test set     |      |      |      |      |      |
| 1AJU         | 1AM0 | 1ARJ | 1BYJ | 1DDY | 1EHT |
| 1EI2         | 1EVV | 1F1T | 1FMN | 1FUF | 1FYP |
| 1I7J         | 1I9V | 1J7T | 1KOD | 1LC4 | 1MWL |
| 1NBK         | 1NEM | 1NTA | 1NTB | 1O15 | 1O9M |
| 1Q8N         | 1RAW | 1TN1 | 1TN2 | 1TOB | 1UTS |
| 1UUD         | 1UUI | 1XPF | 1YKV | 1YLS | 1YRJ |
| 1ZZ5         | 292D | 2A04 | 2AU4 | 2B57 | 2EES |
| 2EET         | 2EEU | 2EEW | 2ESI | 2ESJ | 2ET3 |
| 2ET5         | 2ET8 | 2F4S | 2F4U | 2FCX | 2FCY |
| 2FCZ         | 2G5K | 2G5Q | 2G9C | 2GCV | 2GDI |
| 2GIS         | 2GQ5 | 2HOP | 2JUK | 2KD4 | 2KGP |
| 2KU0         | 2KX8 | 2KXM | 2L1V | 2L8H | 2MIY |
| 2MXS         | 2N0J | 2OE5 | 2OE8 | 2PWT | 2QWY |
| 2TOB         | 2W89 | 2XNW | 2XNZ | 2XO0 | 2YDH |
| 2YIE         | 3B4B | 3B4C | 3C3Z | 3C44 | 3C5D |
| 3C7R         | 3D0U | 3D2X | 3DIG | 3DIL | 3DIM |
| 3DIO         | 3DIY | 3DIZ | 3DJ0 | 3DJ2 | 3DS7 |
| 3DVV         | 3DVZ | 3DW4 | 3DW6 | 3E5C | 3E5E |
| 3E5F         | 3F2Q | 3F2T | 3F4G | 3F4H | 3FO6 |
| 3FU2         | 3G4M | 3GAO | 3GCA | 3GER | 3GOG |
| 3GOT         | 3GX2 | 3GX3 | 3GX5 | 3GX6 | 3GX7 |
| 3IQN         | 3IQR | 3IRW | 3K1V | 3LA5 | 3NPN |
| 3NPQ         | 3OWI | 3OWZ | 3Q3Z | 3Q50 | 3RKF |
| 3S4P         | 3SD3 | 3SKI | 3SKR | 3SKT | 3SKW |
| 3SKZ         | 3SLM | 3SLQ | 3TD1 | 3TZR | 3WRU |
| 4AOB         | 4B5R | 4ERL | 4F8U | 4F8V | 4FE5 |
| 4FEL         | 4FEN | 4FEP | 4FRG | 4GPW | 4GPX |
| 4GPY         | 4JF2 | 4K32 | 4L81 | 4LVV | 4LVX |
| 4LVY         | 4LVZ | 4LX5 | 4LX6 | 4NYA | 4NYC |
| 4NYD         | 4NYG | 4OQU | 4P20 | 4PDQ | 4QK8 |
| 4QK9         | 4QKA | 4QLM | 4QLN | 4RZD | 4TS0 |
| 4TS2         | 4TZX | 4TZY | 4WCQ | 4WCR | 4XNR |
| 4YAZ         | 4YB0 | 4YB1 | 4ZC7 | 5C7U | 5C7W |
| 5NDH         | 5NEF |      |      |      |      |

**Table S2:** Results of the docking predictions for the training and test sets<sup>a</sup>

| PDB          | exp. | charge | ligand <sup>b</sup> | top 1 | top 3 | top 200 | success case <sup>c</sup> |                           |                    |                           |
|--------------|------|--------|---------------------|-------|-------|---------|---------------------------|---------------------------|--------------------|---------------------------|
| Training set |      |        |                     |       |       |         |                           |                           |                    |                           |
| 1AKX         | nmr  | GAS    | ARG                 | 13.64 | 13.64 | 2.33    | —                         |                           |                    |                           |
| 1ET4         | xray | AM1    | CNC                 | 0.98  | 0.98  | 0.98    | 0.98 (1)                  |                           |                    |                           |
| 1F27         | xray | AM1    | BTN                 | 1.80  | 1.72  | 1.28    | 1.80 (1)                  |                           |                    |                           |
| 1J8G         | xray | AM1    | SPM                 | 7.67  | 7.67  | 1.47    | 1.47 (57)                 |                           |                    |                           |
| 1KOC         | nmr  | GAS    | ARG                 | 9.01  | 3.93  | 2.18    | —                         |                           |                    |                           |
| 1LVJ         | nmr  | GAS    | PMZ                 | 0.70  | 0.70  | 0.70    | 0.70 (1)                  |                           |                    |                           |
| 1PBR         | nmr  | GAS    | PAR                 | 1.21  | 1.21  | 1.21    | 1.21 (1)                  |                           |                    |                           |
| 1QD3         | nmr  | GAS    | NEB                 | 0.27  | 0.27  | 0.27    | 0.27 (1)                  |                           |                    |                           |
| 1Y26         | xray | AM1    | ADE                 | 1.07  | 1.07  | 1.07    | 1.07 (1)                  |                           |                    |                           |
| 2BE0         | xray | AM1    | JS5                 | 0.82  | 0.82  | 0.82    | 0.82 (1)                  |                           |                    |                           |
| 2BEE         | xray | AM1    | JS4                 | 0.80  | 0.80  | 0.80    | 0.80 (1)                  |                           |                    |                           |
| 2ET4         | xray | AM1    | NMY                 | 0.74  | 0.74  | 0.74    | 0.74 (1)                  |                           |                    |                           |
| 2F4T         | xray | AM1    | AB9                 | 9.06  | 1.20  | 1.13    | 1.20 (3)                  |                           |                    |                           |
| 2FD0         | xray | AM1    | LIV                 | 1.17  | 1.17  | 1.17    | 1.17 (1)                  |                           |                    |                           |
| 2KTZ         | nmr  | GAS    | ISH                 | 2.82  | 1.10  | 1.10    | 1.10 (2)                  |                           |                    |                           |
| 2O3X         | xray | AM1    | N30                 | 1.35  | 1.35  | 1.10    | 1.35 (1)                  |                           |                    |                           |
| 2XO1         | xray | AM1    | N6M                 | 3.59  | 1.02  | 1.02    | 1.02 (3)                  |                           |                    |                           |
| 3DIX         | xray | AM1    | LYS                 | 5.17  | 5.02  | 1.55    | 1.91 (6)                  |                           |                    |                           |
| 3FO4         | xray | AM1    | 6GU                 | 2.92  | 1.29  | 1.29    | 1.29 (3)                  |                           |                    |                           |
| 3GES         | xray | AM1    | 6GO                 | 1.26  | 1.26  | 1.26    | 1.26 (1)                  |                           |                    |                           |
| 3SKL         | xray | AM1    | GNG                 | 1.87  | 1.87  | 1.60    | 1.87 (1)                  |                           |                    |                           |
| 3SUH         | xray | AM1    | FFO                 | 1.70  | 1.70  | 1.70    | 1.70 (1)                  |                           |                    |                           |
| 3SUX         | xray | AM1    | THF                 | 34.63 | 34.63 | 1.04    | 1.04 (9)                  |                           |                    |                           |
| 4FEJ         | xray | AM1    | HPA                 | 2.63  | 2.63  | 0.82    | 0.82 (5)                  |                           |                    |                           |
| 4FEO         | xray | AM1    | 6AP                 | 26.13 | 1.06  | 1.06    | 1.06 (2)                  |                           |                    |                           |
| 4KQY         | xray | AM1    | SAM                 | 5.94  | 1.11  | 1.11    | 1.11 (3)                  |                           |                    |                           |
| 4LVW         | xray | AM1    | 7DG                 | 3.94  | 3.94  | 1.16    | 1.51 (10)                 |                           |                    |                           |
| 4LW0         | xray | AM1    | ADE                 | 3.20  | 3.20  | 1.52    | 1.52 (20)                 |                           |                    |                           |
| 4NYB         | xray | AM1    | 2QC                 | 2.41  | 2.41  | 1.44    | 1.44 (5)                  |                           |                    |                           |
| 5C45         | xray | AM1    | 51B                 | 1.53  | 1.53  | 1.18    | 1.53 (1)                  |                           |                    |                           |
| PDB          | exp. | charge | ligand <sup>b</sup> | top 1 | top 3 | top 200 | success case <sup>c</sup> | number of rotatable bonds | top 3 <sup>d</sup> | success case <sup>d</sup> |
| Test set     |      |        |                     |       |       |         |                           |                           |                    |                           |
| 1AJU         | nmr  | GAS    | ARG                 | 13.46 | 13.31 | 1.92    | 1.92 (46)                 | 5                         | 2.46               | 0.99(20)                  |
| 1AM0         | nmr  | GAS    | AMP                 | 0.88  | 0.88  | 0.88    | 0.88 (1)                  | 4                         | 1.09               | 1.09(2)                   |
| 1ARJ         | nmr  | GAS    | ARG                 | 11.66 | 11.66 | 2.04    | —                         | 4                         | 12.20              | 1.99(77)                  |
| 1BYJ         | nmr  | GAS    | C1A                 | 1.57  | 1.57  | 1.37    | 1.57 (1)                  | 6                         | 1.79               | 1.79(1)                   |
| 1DDY         | xray | AM1    | B12                 | 22.73 | 1.68  | 1.68    | 1.68 (3)                  | 27                        | 20.44              | 1.74(14)                  |
| 1EHT         | nmr  | GAS    | TEP                 | 3.29  | 1.30  | 1.30    | 1.30 (2)                  | 0                         | 1.30               | 1.30(2)                   |
| 1EI2         | nmr  | GAS    | NMY                 | 3.44  | 3.44  | 1.13    | 1.13 (5)                  | 9                         | 3.01               | 0.23(235)                 |
| 1EVV         | xray | AM1    | SPM                 | 21.66 | 21.66 | 8.49    | —                         | 11                        | 13.43              | —                         |
| 1FIT         | xray | AM1    | ROS                 | 1.31  | 1.31  | 1.28    | 1.31 (1)                  | 3                         | 1.25               | 1.25(2)                   |
| 1FMN         | nmr  | GAS    | FMN                 | 4.95  | 4.95  | 1.03    | 1.03 (4)                  | 7                         | 2.62               | 1.26(8)                   |

|      |      |     |     |       |       |      |            |    |       |           |
|------|------|-----|-----|-------|-------|------|------------|----|-------|-----------|
| 1FUF | xray | AM1 | SPM | 7.65  | 6.14  | 1.40 | 1.40 (165) | 10 | 7.17  | 1.26(57)  |
| 1FYF | nmr  | GAS | PAR | 0.36  | 0.36  | 0.36 | 0.36 (1)   | 9  | 2.48  | 0.94(4)   |
| 1I7J | xray | AM1 | MPD | 14.71 | 10.78 | 3.16 | —          | 2  | 3.54  | —         |
| 1I9V | xray | AM1 | NMY | 25.51 | 25.06 | 5.37 | —          | 9  | 24.68 | —         |
| 1I7T | xray | AM1 | PAR | 1.53  | 1.35  | 1.35 | 1.53 (1)   | 9  | 1.46  | 1.46(3)   |
| 1KOD | nmr  | GAS | CIR | 4.39  | 2.24  | 1.93 | 1.93 (21)  | 4  | 4.11  | 1.83(54)  |
| 1LC4 | xray | AM1 | TOY | 0.85  | 0.85  | 0.85 | 0.85 (1)   | 6  | 0.87  | 0.87(1)   |
| 1MWL | xray | AM1 | GET | 0.68  | 0.68  | 0.68 | 0.68 (1)   | 6  | 0.96  | 0.96(1)   |
| 1NBK | nmr  | GAS | GND | 3.77  | 3.77  | 1.22 | 1.22 (40)  | 4  | 4.25  | —         |
| 1NEM | nmr  | GAS | NEB | 0.76  | 0.76  | 0.76 | 0.76 (1)   | 9  | 0.83  | 1.88(1)   |
| 1NTA | xray | AM1 | SRY | 5.10  | 5.10  | 2.97 | 1.13 (472) | 9  | 2.93  | 1.34(21)  |
| 1NTB | xray | AM1 | SRY | 18.49 | 3.88  | 0.98 | 0.98 (42)  | 9  | 1.96  | 1.96(2)   |
| 1O15 | nmr  | GAS | TEP | 4.51  | 2.55  | 1.18 | 1.63 (55)  | 0  | 2.55  | 1.63(55)  |
| 1O9M | xray | AM1 | AB6 | 11.12 | 1.28  | 1.28 | 1.28 (3)   | 16 | 3.46  | 1.24(4)   |
| 1Q8N | nmr  | GAS | MGR | 0.56  | 0.56  | 0.56 | 0.56 (1)   | 5  | 1.93  | 1.93(1)   |
| 1RAW | nmr  | GAS | AMP | 7.24  | 1.82  | 0.83 | 1.82 (3)   | 4  | 1.68  | 1.68(1)   |
| 1TN1 | xray | AM1 | SPM | 17.06 | 16.02 | 0.82 | 0.82 (67)  | 11 | 17.85 | 1.28(129) |
| 1TN2 | xray | AM1 | SPM | 18.15 | 13.60 | 0.82 | 0.82 (70)  | 11 | 13.43 | 1.54(65)  |
| 1TOB | nmr  | GAS | TOB | 5.20  | 5.20  | 0.62 | 1.82 (24)  | 6  | 5.23  | 1.81(40)  |
| 1UTS | nmr  | GAS | P13 | 10.58 | 7.24  | 1.64 | 1.64 (21)  | 10 | 9.06  | —         |
| 1UUD | nmr  | GAS | P14 | 8.99  | 3.46  | 2.44 | 1.97 (232) | 12 | 8.96  | 1.49(118) |
| 1UUI | nmr  | GAS | P12 | 13.46 | 12.59 | 3.34 | —          | 7  | 12.77 | —         |
| 1XPF | xray | AM1 | SPM | 5.18  | 5.18  | 2.07 | 1.96 (375) | 11 | 4.45  | —         |
| 1YKV | xray | AM1 | DAI | 1.53  | 1.53  | 1.53 | 1.53 (1)   | 5  | 1.67  | 1.67(1)   |
| 1YLS | xray | AM1 | DAI | 6.57  | 1.54  | 1.54 | 1.66 (2)   | 5  | 1.59  | 1.59(1)   |
| 1YRJ | xray | AM1 | AM2 | 9.99  | 0.71  | 0.71 | 0.71 (3)   | 6  | 2.10  | 1.94(6)   |
| 1ZZ5 | xray | AM1 | CNY | 1.76  | 1.56  | 0.94 | 1.76 (1)   | 4  | 3.46  | 1.81(8)   |
| 292D | xray | AM1 | P24 | 10.19 | 9.01  | 6.21 | —          | 6  | 9.35  | —         |
| 2A04 | xray | AM1 | NMY | 0.90  | 0.90  | 0.90 | 0.90 (1)   | 9  | 0.93  | 0.93(3)   |
| 2AU4 | nmr  | GAS | GTP | 19.63 | 4.87  | 0.57 | 0.57 (9)   | 8  | 13.57 | 0.65(14)  |
| 2B57 | xray | AM1 | 6AP | 0.90  | 0.90  | 0.90 | 0.90 (1)   | 0  | 0.90  | 0.90(1)   |
| 2EES | xray | AM1 | HPA | 26.39 | 1.14  | 1.14 | 1.13 (3)   | 0  | 1.14  | 1.13(3)   |
| 2EET | xray | AM1 | HPA | 2.74  | 1.13  | 1.13 | 1.13 (3)   | 0  | 1.13  | 1.13(3)   |
| 2EEU | xray | AM1 | HPA | 1.60  | 1.60  | 0.79 | 1.60 (1)   | 0  | 1.60  | 1.60(1)   |
| 2EEW | xray | AM1 | HPA | 26.07 | 3.37  | 0.96 | 0.96 (12)  | 0  | 3.37  | 0.96(12)  |
| 2ESI | xray | AM1 | KAN | 0.77  | 0.77  | 0.77 | 0.77 (1)   | 6  | 1.32  | 1.32(1)   |
| 2ESJ | xray | AM1 | LIV | 1.74  | 1.74  | 0.96 | 1.74 (1)   | 12 | 4.06  | 1.24(77)  |
| 2ET3 | xray | AM1 | LLL | 0.72  | 0.72  | 0.72 | 0.72 (1)   | 6  | 0.77  | 0.77(1)   |
| 2ET5 | xray | AM1 | RIO | 0.88  | 0.88  | 0.88 | 0.88 (1)   | 6  | 0.89  | 0.89(1)   |
| 2ET8 | xray | AM1 | XXX | 1.46  | 1.46  | 1.41 | 1.46 (1)   | 3  | 5.91  | 1.85(82)  |
| 2F4S | xray | AM1 | XXX | 8.90  | 2.76  | 1.28 | 1.36 (14)  | 3  | 5.36  | 1.97(84)  |
| 2F4U | xray | AM1 | AB6 | 9.00  | 5.37  | 1.22 | 1.22 (12)  | 15 | 2.99  | 1.22(4)   |
| 2FCX | xray | AM1 | XXX | 1.05  | 1.05  | 1.05 | 1.05 (1)   | 3  | 2.60  | 1.91(5)   |
| 2FCY | xray | AM1 | NMY | 0.84  | 0.84  | 0.84 | 0.84 (1)   | 9  | 2.06  | 1.30(11)  |
| 2FCZ | xray | AM1 | RIO | 0.71  | 0.71  | 0.71 | 0.71 (1)   | 6  | 0.86  | 0.86(1)   |
| 2G5K | xray | AM1 | AM2 | 2.08  | 2.08  | 1.31 | 1.31 (4)   | 6  | 10.52 | 1.31(86)  |
| 2G5Q | xray | AM1 | AKN | 0.99  | 0.99  | 0.99 | 0.99 (1)   | 11 | 3.46  | 1.00(5)   |



|      |      |     |     |       |       |      |            |    |       |           |
|------|------|-----|-----|-------|-------|------|------------|----|-------|-----------|
| 2G9C | xray | AM1 | 3AY | 25.59 | 25.54 | 0.82 | 2.00 (6)   | 0  | 25.54 | 2.00(6)   |
| 2GCV | xray | AM1 | MES | 13.40 | 13.40 | 2.46 | —          | 3  | 13.20 | —         |
| 2GDI | xray | AM1 | TPP | 25.94 | 22.35 | 1.03 | 1.03 (154) | 8  | 19.51 | 1.44(146) |
| 2GIS | xray | AM1 | SAM | 1.33  | 1.33  | 0.92 | 1.33 (1)   | 6  | 0.99  | 0.99(1)   |
| 2GQ5 | xray | AM1 | GOL | 20.86 | 20.73 | 3.21 | —          | 2  | 20.69 | —         |
| 2HOP | xray | AM1 | 218 | 6.81  | 3.10  | 1.34 | 1.34 (42)  | 4  | 4.82  | 1.48(81)  |
| 2JUK | nmr  | GAS | G0B | 3.19  | 3.19  | 2.81 | —          | 15 | 7.82  | —         |
| 2KD4 | nmr  | GAS | PRL | 1.12  | 1.12  | 1.12 | 1.12 (1)   | 0  | 1.12  | 1.12(1)   |
| 2KGP | nmr  | GAS | MIX | 0.20  | 0.20  | 0.20 | 0.20 (1)   | 12 | 1.90  | 1.90(1)   |
| 2KU0 | nmr  | GAS | ISI | 1.76  | 1.76  | 1.12 | 1.76 (1)   | 6  | 6.10  | 1.61(12)  |
| 2KX8 | nmr  | GAS | ARG | 8.15  | 5.58  | 1.64 | 1.64 (58)  | 5  | 7.51  | 1.93(31)  |
| 2KXM | nmr  | GAS | RIO | 0.98  | 0.98  | 0.98 | 0.98 (1)   | 6  | 1.68  | 1.68(2)   |
| 2L1V | nmr  | GAS | PRF | 2.68  | 0.54  | 0.54 | 0.54 (2)   | 1  | 0.51  | 0.51(1)   |
| 2L8H | nmr  | GAS | VIB | 5.16  | 5.16  | 0.69 | 0.69 (7)   | 8  | 0.94  | 0.94(1)   |
| 2MIY | nmr  | GAS | PRF | 1.25  | 1.25  | 1.25 | 1.25 (1)   | 1  | 1.24  | 1.43(1)   |
| 2MXS | nmr  | GAS | PAR | 3.84  | 2.98  | 1.12 | 1.25 (4)   | 9  | 3.75  | 1.34(15)  |
| 2NOJ | nmr  | GAS | RIO | 4.77  | 3.84  | 1.63 | 1.71 (15)  | 6  | 2.51  | 1.52(32)  |
| 2OE5 | xray | AM1 | AM2 | 9.52  | 9.52  | 1.02 | 1.02 (21)  | 6  | 9.46  | 1.11(18)  |
| 2OE8 | xray | AM1 | AM2 | 14.45 | 5.14  | 1.08 | 1.61 (6)   | 6  | 10.65 | 1.41(51)  |
| 2PWT | xray | AM1 | LHA | 0.57  | 0.57  | 0.57 | 0.57 (1)   | 21 | 9.29  | 1.68(4)   |
| 2QWY | xray | AM1 | SAM | 25.67 | 11.01 | 0.56 | 0.56 (4)   | 6  | 9.29  | 0.72(17)  |
| 2TOB | nmr  | GAS | TOB | 1.02  | 1.02  | 1.02 | 1.02 (1)   | 6  | 1.01  | 1.01(1)   |
| 2W89 | xray | AM1 | GOL | 5.27  | 5.05  | 1.17 | 1.17 (61)  | 2  | 5.08  | —         |
| 2XNW | xray | AM1 | ZZR | 2.47  | 2.47  | 0.75 | 0.75 (6)   | 0  | 2.47  | 0.75(6)   |
| 2XNZ | xray | AM1 | 3AW | 3.32  | 3.32  | 0.77 | 0.77 (16)  | 0  | 3.32  | 0.77(16)  |
| 2XO0 | xray | AM1 | ZZS | 4.05  | 3.42  | 1.23 | 1.23 (20)  | 0  | 3.42  | 1.23(20)  |
| 2YDH | xray | AM1 | SAM | 3.82  | 1.15  | 1.15 | 1.15 (2)   | 6  | 1.16  | 1.16(2)   |
| 2YIE | xray | AM1 | FMN | 0.93  | 0.93  | 0.93 | 0.93 (1)   | 7  | 2.09  | 0.80(4)   |
| 3B4B | xray | AM1 | GLP | 41.44 | 26.80 | 1.29 | 1.29 (27)  | 3  | 7.11  | 1.11(37)  |
| 3B4C | xray | AM1 | GLP | 31.47 | 30.40 | 1.43 | 1.52 (24)  | 3  | 31.19 | 1.22(33)  |
| 3C3Z | xray | AM1 | RIO | 0.51  | 0.51  | 0.51 | 0.51 (1)   | 6  | 1.43  | 1.43(2)   |
| 3C44 | xray | AM1 | PAR | 1.42  | 0.84  | 0.84 | 1.42 (1)   | 9  | 1.60  | 1.60(1)   |
| 3C5D | xray | AM1 | LIV | 1.98  | 1.98  | 0.54 | 1.98 (1)   | 12 | 2.29  | 1.74(7)   |
| 3C7R | xray | AM1 | NMY | 1.09  | 1.09  | 1.09 | 1.09 (1)   | 9  | 1.57  | 1.57(3)   |
| 3D0U | xray | AM1 | LYS | 1.63  | 1.63  | 1.40 | 1.63 (1)   | 4  | 1.62  | 1.62(1)   |
| 3D2X | xray | AM1 | D2X | 20.35 | 20.35 | 1.30 | 1.32 (54)  | 8  | 28.64 | 1.16(67)  |
| 3DIG | xray | AM1 | SLZ | 5.39  | 4.36  | 1.24 | 1.99 (4)   | 4  | 1.43  | 1.43(2)   |
| 3DIL | xray | AM1 | LYS | 2.52  | 2.52  | 1.50 | 1.54 (5)   | 4  | 1.40  | 1.40(3)   |
| 3DIM | xray | AM1 | LYS | 2.49  | 2.49  | 1.33 | 1.33 (4)   | 4  | 2.84  | 1.46(6)   |
| 3DIO | xray | AM1 | LYS | 5.07  | 2.35  | 1.01 | 1.32 (9)   | 4  | 2.85  | 1.59(12)  |
| 3DIY | xray | AM1 | LYS | 5.22  | 2.38  | 1.12 | 1.41 (7)   | 4  | 2.69  | 1.71(7)   |
| 3DIZ | xray | AM1 | LYS | 41.80 | 1.93  | 1.67 | 1.93 (3)   | 4  | 2.65  | 1.59(5)   |
| 3DJ0 | xray | AM1 | OLZ | 4.82  | 2.30  | 1.19 | 1.19 (16)  | 4  | 4.61  | 1.65(5)   |
| 3DJ2 | xray | AM1 | LYS | 2.93  | 1.22  | 1.06 | 1.22 (3)   | 4  | 2.46  | 1.36(6)   |
| 3DS7 | xray | AM1 | GNG | 1.02  | 1.02  | 1.02 | 1.02 (1)   | 2  | 1.20  | 1.20(2)   |
| 3DVV | xray | AM1 | RIO | 1.17  | 1.17  | 1.17 | 1.17 (1)   | 6  | 0.96  | 0.96(1)   |
| 3DVZ | xray | AM1 | GOL | 24.50 | 4.39  | 3.02 | —          | 2  | 3.45  | —         |

|      |      |     |     |       |       |      |            |    |       |          |
|------|------|-----|-----|-------|-------|------|------------|----|-------|----------|
| 3DW4 | xray | AM1 | GOL | 24.04 | 24.04 | 2.71 | —          | 2  | 3.85  | —        |
| 3DW6 | xray | AM1 | GOL | 4.31  | 4.05  | 2.48 | —          | 2  | 3.74  | 1.97(65) |
| 3E5C | xray | AM1 | SAM | 4.73  | 1.13  | 1.13 | 1.13 (2)   | 6  | 1.47  | 1.47(2)  |
| 3E5E | xray | AM1 | SAH | 10.05 | 4.64  | 1.27 | 1.40 (8)   | 6  | 6.67  | 1.77(4)  |
| 3E5F | xray | AM1 | EEM | 14.92 | 7.36  | 1.19 | 1.57 (6)   | 6  | 2.60  | 1.68(13) |
| 3F2Q | xray | AM1 | FMN | 26.44 | 1.62  | 1.09 | 1.62 (3)   | 7  | 1.24  | 1.24(3)  |
| 3F2T | xray | AM1 | FMN | 4.72  | 1.13  | 1.13 | 1.13 (3)   | 7  | 1.93  | 1.93(1)  |
| 3F4G | xray | AM1 | RBF | 1.24  | 1.24  | 1.11 | 1.24 (1)   | 5  | 1.67  | 1.67(3)  |
| 3F4H | xray | AM1 | RS3 | 1.28  | 1.28  | 1.28 | 1.28 (1)   | 6  | 1.33  | 1.33(2)  |
| 3FO6 | xray | AM1 | 6GO | 3.05  | 1.10  | 1.10 | 1.10 (2)   | 1  | 1.07  | 1.07(2)  |
| 3FU2 | xray | AM1 | PRF | 2.80  | 1.41  | 1.13 | 1.41 (2)   | 1  | 1.64  | 1.64(2)  |
| 3G4M | xray | AM1 | 2BP | 2.54  | 1.69  | 0.96 | 1.69 (2)   | 0  | 1.69  | 1.69(2)  |
| 3GAO | xray | AM1 | XAN | 3.57  | 3.06  | 0.99 | 0.99 (5)   | 0  | 3.06  | 0.99(5)  |
| 3GCA | xray | AM1 | PQ0 | 4.84  | 0.70  | 0.70 | 0.70 (3)   | 0  | 0.70  | 0.70(3)  |
| 3GER | xray | AM1 | 6GU | 2.79  | 1.31  | 1.31 | 1.31 (2)   | 0  | 1.31  | 1.31(2)  |
| 3GOG | xray | AM1 | 6GU | 1.03  | 1.03  | 1.03 | 1.03 (1)   | 0  | 1.03  | 1.03(1)  |
| 3GOT | xray | AM1 | A2F | 1.06  | 1.06  | 1.06 | 1.06 (1)   | 0  | 1.06  | 1.06(1)  |
| 3GX2 | xray | AM1 | SFG | 1.20  | 1.20  | 1.15 | 1.20 (1)   | 6  | 1.22  | 1.22(1)  |
| 3GX3 | xray | AM1 | SAH | 27.38 | 4.52  | 0.93 | 0.93 (4)   | 6  | 1.87  | 1.87(1)  |
| 3GX5 | xray | AM1 | SAM | 1.24  | 1.24  | 1.24 | 1.24 (1)   | 6  | 1.21  | 1.21(1)  |
| 3GX6 | xray | AM1 | SAM | 5.17  | 5.17  | 0.89 | 0.89 (4)   | 6  | 1.52  | 1.52(1)  |
| 3GX7 | xray | AM1 | SAM | 25.75 | 7.03  | 1.15 | 1.15 (4)   | 6  | 2.50  | 1.14(9)  |
| 3IQN | xray | AM1 | SAM | 6.98  | 2.30  | 1.21 | 1.21 (21)  | 6  | 2.75  | 1.12(6)  |
| 3IQR | xray | AM1 | SAM | 8.04  | 5.09  | 1.27 | 1.27 (4)   | 6  | 1.65  | 1.65(1)  |
| 3IRW | xray | AM1 | C2E | 7.01  | 1.02  | 1.02 | 1.17 (2)   | 2  | 13.01 | 1.10(68) |
| 3K1V | xray | AM1 | PRF | 2.56  | 0.96  | 0.96 | 0.96 (2)   | 1  | 1.01  | 1.01(2)  |
| 3LA5 | xray | AM1 | 5AZ | 4.72  | 4.42  | 1.00 | 1.85 (18)  | 0  | 4.42  | 1.85(18) |
| 3NPN | xray | AM1 | SAH | 0.69  | 0.69  | 0.69 | 0.69 (1)   | 6  | 1.62  | 1.62(1)  |
| 3NPQ | xray | AM1 | SAH | 1.25  | 1.25  | 1.25 | 1.25 (1)   | 6  | 1.29  | 1.29(1)  |
| 3OWI | xray | AM1 | GLY | 51.81 | 51.76 | 1.40 | 1.40 (68)  | 0  | 51.76 | 1.40(68) |
| 3OWZ | xray | AM1 | GLY | 46.96 | 17.29 | 1.21 | 1.21 (86)  | 0  | 17.29 | 1.21(86) |
| 3Q3Z | xray | AM1 | C2E | 1.18  | 1.18  | 1.18 | 1.18 (1)   | 2  | 1.01  | 1.01(1)  |
| 3Q50 | xray | AM1 | PRF | 2.74  | 2.74  | 1.08 | 1.89 (6)   | 1  | 1.34  | 1.34(1)  |
| 3RKF | xray | AM1 | DX4 | 3.12  | 1.75  | 1.16 | 1.75 (3)   | 0  | 1.75  | 1.75(3)  |
| 3S4P | xray | AM1 | JS6 | 0.85  | 0.85  | 0.85 | 0.85 (1)   | 16 | 1.43  | 1.43(1)  |
| 3SD3 | xray | AM1 | FOZ | 3.84  | 3.84  | 0.94 | 0.94 (9)   | 4  | 1.73  | 1.73(1)  |
| 3SKI | xray | AM1 | GNG | 7.05  | 2.14  | 1.29 | 1.29 (5)   | 2  | 1.54  | 1.54(1)  |
| 3SKR | xray | AM1 | GNG | 4.46  | 4.46  | 1.33 | 1.75 (36)  | 2  | 1.56  | 1.56(2)  |
| 3SKT | xray | AM1 | GNG | 5.19  | 5.19  | 1.32 | 1.75 (6)   | 2  | 1.83  | 1.83(1)  |
| 3SKW | xray | AM1 | GNG | 2.51  | 2.51  | 1.30 | 1.79 (36)  | 2  | 1.40  | 1.40(1)  |
| 3SKZ | xray | AM1 | GMP | 28.76 | 10.35 | 0.64 | 1.69 (17)  | 2  | 1.59  | 1.59(2)  |
| 3SLM | xray | AM1 | DGP | 29.01 | 26.00 | 0.80 | 1.37 (4)   | 4  | 1.03  | 1.03(3)  |
| 3SLQ | xray | AM1 | 5GP | 34.24 | 1.90  | 1.15 | 1.90 (2)   | 4  | 10.20 | 1.34(4)  |
| 3TD1 | xray | AM1 | GET | 0.61  | 0.61  | 0.61 | 0.61 (1)   | 6  | 1.49  | 1.49(1)  |
| 3TZR | xray | AM1 | SS0 | 5.70  | 1.53  | 1.19 | 1.53 (3)   | 6  | 1.85  | 1.85(1)  |
| 3WRU | xray | AM1 | SJP | 1.16  | 1.16  | 1.16 | 1.16 (1)   | 14 | 2.72  | 1.21(15) |
| 4AOB | xray | AM1 | SAM | 3.45  | 3.45  | 0.77 | 0.77 (161) | 6  | 0.87  | 0.87(1)  |

|      |      |     |     |       |       |      |           |    |       |          |
|------|------|-----|-----|-------|-------|------|-----------|----|-------|----------|
| 4B5R | xray | AM1 | SAM | 1.05  | 1.05  | 1.05 | 1.05 (1)  | 6  | 3.26  | 1.07(5)  |
| 4ERL | xray | AM1 | LYS | 4.56  | 1.26  | 0.82 | 1.26 (2)  | 7  | 1.44  | 1.44(3)  |
| 4F8U | xray | AM1 | SIS | 0.68  | 0.68  | 0.68 | 0.68 (1)  | 6  | 1.35  | 1.35(1)  |
| 4F8V | xray | AM1 | SIS | 0.53  | 0.53  | 0.53 | 0.53 (1)  | 6  | 1.12  | 1.12(1)  |
| 4FE5 | xray | AM1 | HPA | 3.71  | 1.00  | 1.00 | 1.00 (2)  | 0  | 1.00  | 1.00(2)  |
| 4FEL | xray | AM1 | HPA | 3.85  | 1.12  | 1.12 | 1.12 (2)  | 0  | 1.12  | 1.12(2)  |
| 4FEN | xray | AM1 | HPA | 2.93  | 1.24  | 1.24 | 1.24 (2)  | 0  | 1.24  | 1.24(2)  |
| 4FEP | xray | AM1 | 6AP | 1.31  | 1.31  | 1.15 | 1.31 (1)  | 0  | 1.31  | 1.31(1)  |
| 4FRG | xray | AM1 | I2A | 35.67 | 27.01 | 1.58 | 1.91 (16) | 27 | 9.39  | 1.85(74) |
| 4GPW | xray | AM1 | 6HS | 0.57  | 0.57  | 0.57 | 0.57 (1)  | 6  | 1.04  | 1.04(1)  |
| 4GPX | xray | AM1 | 6HS | 1.29  | 1.29  | 1.24 | 1.29 (1)  | 6  | 1.56  | 1.56(2)  |
| 4GPY | xray | AM1 | 6HS | 0.63  | 0.63  | 0.63 | 0.63 (1)  | 6  | 1.26  | 1.26(1)  |
| 4JF2 | xray | AM1 | PRF | 4.57  | 2.19  | 0.57 | 0.57 (4)  | 1  | 0.80  | 0.80(1)  |
| 4K32 | xray | AM1 | GET | 1.04  | 1.04  | 1.04 | 1.04 (1)  | 6  | 1.41  | 1.41(1)  |
| 4L81 | xray | AM1 | SAM | 1.09  | 1.09  | 0.93 | 1.09 (1)  | 6  | 1.10  | 1.47(1)  |
| 4LVV | xray | AM1 | FFO | 13.97 | 7.07  | 0.76 | 0.76 (5)  | 5  | 2.62  | 0.77(18) |
| 4LVX | xray | AM1 | H4B | 1.49  | 1.49  | 1.33 | 1.49 (1)  | 2  | 1.61  | 1.61(2)  |
| 4LVY | xray | AM1 | LYA | 28.05 | 26.70 | 0.68 | 0.68 (15) | 4  | 26.17 | 1.56(22) |
| 4LVZ | xray | AM1 | 6AP | 12.38 | 10.90 | 1.14 | 1.14 (8)  | 0  | 10.90 | 1.14(8)  |
| 4LX5 | xray | AM1 | 29G | 0.98  | 0.98  | 0.98 | 0.98 (1)  | 0  | 0.98  | 0.98(1)  |
| 4LX6 | xray | AM1 | 29H | 1.19  | 1.19  | 1.17 | 1.19 (1)  | 0  | 1.19  | 1.19(1)  |
| 4NYA | xray | AM1 | 2QB | 2.77  | 2.77  | 1.69 | 1.69 (5)  | 0  | 2.77  | 1.69(5)  |
| 4NYC | xray | AM1 | SVN | 3.09  | 2.17  | 1.43 | 1.52 (11) | 0  | 2.17  | 1.52(11) |
| 4NYD | xray | AM1 | HPA | 1.73  | 1.73  | 1.43 | 1.73 (1)  | 0  | 1.73  | 1.73(1)  |
| 4NYG | xray | AM1 | VIB | 6.49  | 5.86  | 2.07 | —         | 4  | 4.25  | —        |
| 4OQU | xray | AM1 | SAM | 6.28  | 1.09  | 1.09 | 1.09 (2)  | 6  | 1.05  | 1.05(3)  |
| 4P20 | xray | AM1 | AKN | 1.00  | 1.00  | 1.00 | 1.00 (1)  | 11 | 3.75  | 1.02(5)  |
| 4PDQ | xray | AM1 | NMZ | 9.86  | 6.68  | 0.61 | 0.61 (23) | 13 | 7.92  | 1.67(4)  |
| 4QK8 | xray | AM1 | 2BA | 0.71  | 0.71  | 0.71 | 0.71 (1)  | 2  | 40.84 | 1.45(20) |
| 4QK9 | xray | AM1 | 2BA | 0.83  | 0.83  | 0.83 | 0.83 (1)  | 2  | 17.95 | 0.72(42) |
| 4QKA | xray | AM1 | 2BA | 9.22  | 0.36  | 0.36 | 0.36 (2)  | 2  | 0.94  | 0.94(1)  |
| 4QLM | xray | AM1 | 2BA | 0.56  | 0.56  | 0.56 | 0.56 (1)  | 2  | 7.53  | 0.62(10) |
| 4QLN | xray | AM1 | 2BA | 0.87  | 0.87  | 0.87 | 0.87 (1)  | 2  | 0.84  | 0.84(1)  |
| 4RZD | xray | AM1 | PRF | 1.62  | 1.62  | 1.22 | 1.62 (1)  | 1  | 1.49  | 1.49(1)  |
| 4TS0 | xray | AM1 | 38E | 1.07  | 1.07  | 1.07 | 1.07 (1)  | 2  | 0.92  | 1.61(1)  |
| 4TS2 | xray | AM1 | 38E | 1.23  | 1.23  | 1.23 | 1.23 (1)  | 2  | 1.23  | 1.23(1)  |
| 4TZX | xray | AM1 | ADE | 1.47  | 1.47  | 1.15 | 1.47 (1)  | 0  | 1.47  | 1.47(1)  |
| 4TZY | xray | AM1 | ADE | 1.50  | 1.50  | 0.92 | 1.50 (1)  | 0  | 1.50  | 1.50(1)  |
| 4WCQ | xray | AM1 | GET | 9.21  | 0.75  | 0.75 | 0.75 (2)  | 6  | 1.23  | 1.23(1)  |
| 4WCR | xray | AM1 | PAR | 1.26  | 1.26  | 1.26 | 1.26 (1)  | 9  | 3.22  | 1.25(8)  |
| 4XNR | xray | AM1 | ADE | 3.80  | 1.20  | 1.20 | 1.20 (3)  | 0  | 1.20  | 1.20(3)  |
| 4YAZ | xray | AM1 | 4BW | 1.16  | 1.16  | 1.15 | 1.16 (1)  | 2  | 7.86  | 1.24(8)  |
| 4YB0 | xray | AM1 | C2E | 1.02  | 1.02  | 1.02 | 1.02 (1)  | 2  | 8.63  | 1.12(56) |
| 4YB1 | xray | AM1 | 4BW | 0.82  | 0.82  | 0.82 | 0.82 (1)  | 2  | 13.48 | 1.01(54) |
| 4ZC7 | xray | AM1 | PAR | 16.28 | 15.28 | 1.22 | 1.60 (6)  | 9  | 8.96  | 1.60(25) |
| 5C7U | xray | AM1 | HPA | 3.07  | 0.99  | 0.99 | 0.99 (3)  | 0  | 0.99  | 0.99(3)  |
| 5C7W | xray | AM1 | HPA | 2.50  | 2.50  | 1.30 | 1.30 (27) | 0  | 2.50  | 1.30(27) |

|      |      |     |     |       |       |       |          |   |       |         |
|------|------|-----|-----|-------|-------|-------|----------|---|-------|---------|
| 5NDH | xray | AM1 | GAI | 9.53  | 1.88  | 0.79  | 1.88 (2) | 0 | 1.88  | 1.88(2) |
| 5NEF | xray | AM1 | GAI | 13.13 | 12.92 | 12.92 | —        | 0 | 12.92 | —       |

<sup>a</sup> In this table, the first column to the eighth column show the PDBID, experimental method, the method of partial charge assignment, the abbreviated ligand name, the RMSD of the top-ranked pose, the best RMSD in top-3 ranked poses, the best RMSD in top-200 ranked poses, and the RMSD of the first successful case ( $< 2\text{\AA}$ ), respectively.

<sup>b</sup> The abbreviated ligand name.

<sup>c</sup> The number in the brackets is the rank number of the successful case.

<sup>d</sup> The results with the native poses excluded from the pool of ligand conformers.

Table S3: The value of the VDW radius<sup>a</sup>  $a$  and the structural scaling factor<sup>b</sup>  $S$  of various atom species

| atom | O    | P    | H <sup>c</sup> | C    | N    | S    | other atoms <sup>d</sup> |
|------|------|------|----------------|------|------|------|--------------------------|
| $a$  | 1.50 | 1.90 | 1.00           | 1.70 | 1.65 | 1.80 | 1.70                     |
| $S$  | 0.85 | 0.86 | 0.85           | 0.72 | 0.79 | 0.80 | 0.72                     |

r

<sup>a</sup>The VDW radii (Å) are taken from <http://www.rbvi.ucsf.edu/chimera/current/docs/UsersGuide/midas/vdwtables.html>.

<sup>b</sup>The scaling factors for different types of atoms are taken from Ref. 5 in supplemental material.

<sup>c</sup>The hydrogen atoms are neglected in the RLDOCK model.

<sup>d</sup>For other atoms that have low possibility to appear in RNA-ligand complex, we use the value of atom C to replace them.

Table S4: The binding sites and the binding atoms for the training set<sup>a</sup>

| PDB  | RNA atoms | ligand atoms | number of sites | success rank | binding atom | distance (Å) | time (hours) | conformer cutoff (Å) |
|------|-----------|--------------|-----------------|--------------|--------------|--------------|--------------|----------------------|
| 1AKX | 638       | 11           | 157             | 143          | C9           | 0.35         | 0.01         | 1.5                  |
| 1ET4 | 747       | 90           | 244             | 5            | N12          | 0.11         | 0.96         | 3.4                  |
| 1F27 | 634       | 16           | 424             | 175          | N12          | 0.18         | 0.04         | 1.5                  |
| 1J8G | 516       | 14           | 144             | 70           | C4           | 0.18         | 0.03         | 1.4                  |
| 1KOC | 538       | 12           | 170             | 27           | N11          | 0.31         | 0.02         | 1.7                  |
| 1LVJ | 662       | 23           | 435             | 10           | C10          | 0.23         | 0.13         | 1.6                  |
| 1PBR | 572       | 42           | 411             | 128          | C6           | 0.20         | 0.62         | 2.5                  |
| 1QD3 | 615       | 42           | 432             | 4            | C37          | 0.09         | 0.58         | 2.6                  |
| 1Y26 | 1499      | 10           | 739             | 18           | C4           | 0.16         | 0.02         | —                    |
| 2BEO | 892       | 52           | 480             | 32           | C9           | 0.08         | 1.04         | 2.8                  |
| 2BEE | 892       | 49           | 499             | 198          | C11          | 0.16         | 0.95         | 2.4                  |
| 2ET4 | 892       | 42           | 368             | 159          | C11          | 0.29         | 0.59         | 2.4                  |
| 2F4T | 932       | 35           | 350             | 117          | C22          | 0.23         | 0.40         | 2.2                  |
| 2FD0 | 978       | 52           | 373             | 17           | C1           | 0.32         | 1.20         | 2.5                  |
| 2KTZ | 800       | 23           | 336             | 167          | C14          | 0.06         | 0.12         | 1.9                  |
| 2O3X | 892       | 31           | 343             | 118          | C9           | 0.15         | 0.25         | 2.2                  |
| 2XO1 | 1361      | 11           | 1227            | 67           | C3           | 0.21         | 0.02         | 0.9                  |
| 3DIX | 3748      | 10           | 2929            | 207          | C6           | 0.20         | 0.05         | 1.3                  |
| 3FO4 | 1336      | 11           | 1299            | 80           | C1           | 0.17         | 0.02         | —                    |
| 3GES | 1422      | 12           | 1370            | 64           | C11          | 0.11         | 0.03         | 1.2                  |
| 3SKL | 1413      | 19           | 1771            | 125          | C5           | 0.09         | 0.06         | 1.6                  |
| 3SUH | 2173      | 34           | 932             | 2            | N3           | 0.19         | 0.54         | 2.3                  |
| 3SUX | 2173      | 13           | 909             | 56           | C2           | 0.11         | 0.05         | 1.1                  |
| 4FEJ | 1425      | 10           | 1177            | 78           | O7           | 0.11         | 0.01         | —                    |
| 4FEO | 1425      | 11           | 1206            | 6            | C4           | 0.21         | 0.02         | —                    |
| 4KQY | 2556      | 27           | 1785            | 20           | O16          | 0.26         | 0.26         | 2.2                  |
| 4LVW | 1910      | 11           | 1030            | 113          | C8           | 0.19         | 0.03         | —                    |
| 4LW0 | 1910      | 10           | 973             | 85           | C2           | 0.31         | 0.03         | —                    |
| 4NYB | 1673      | 13           | 1308            | 44           | N10          | 0.22         | 0.04         | 1.3                  |
| 5C45 | 2337      | 27           | 2287            | 146          | N22          | 0.14         | 0.34         | 2.1                  |

<sup>a</sup> The first column presents the PDB codes. The second and third columns show the number of heavy atoms in RNA and ligand. The fourth to ninth columns show the number of candidate binding sites after the ball probe detects, the number of the ranked site for the successful global search, the name of the binding atom in the ligand which should be bound to the binding site, the distance between the success site and the closest atom in reference ligand, the computational time of global search using the optimization in compilation and 30-thread parallelization on a PC with an AMD Ryzen Threadripper 1950X 16-Core Processor and 64 GB RAM, and the cutoff RMSD to assign 201 ligand conformers into 30 clusters.

Table S5: The prediction results of 51 cases containing multiple binding sites in crystal structures<sup>a</sup>

| PDB  | site 1    | site 2    | PDB      | site 1    | site 2   |
|------|-----------|-----------|----------|-----------|----------|
| 1I7J | —         | —         | 1J7T     | 1.53(1)   | 1.90(2)  |
| 1LC4 | 0.96(1)   | 0.85(2)   | 1MWL     | 0.68(1)   | 0.64(2)  |
| 1NBK | 1.22(80)  | 1.86(26)  | 1YRJ     | 1.43(43)  | 0.71(5)  |
| 2BE0 | 1.37(2)   | 0.87(1)   | 2BEE     | 0.80(3)   | 1.40(7)  |
| 2ESJ | 0.94(11)  | 1.73(1)   | 2ET3     | 0.84(2)   | 0.72(1)  |
| 2ET4 | 1.59(6)   | 1.64(70)  | 2FCX     | 0.93(5)   | 1.04(1)  |
| 2FCY | 0.73(3)   | 0.84(2)   | 2FCZ     | 0.80(1)   | 0.73(3)  |
| 2FD0 | 1.17(25)  | 1.87(126) | 2G5K     | 1.96(120) | 1.32(16) |
| 2G5Q | 0.97(1)   | 0.99(2)   | 2KD4     | 1.40(2)   | 1.12(4)  |
| 3C3Z | 0.66(1)   | 0.51(2)   | 3C44     | 1.42(1)   | 1.59(2)  |
| 3C5D | 1.89(3)   | 1.98(1)   | 3C7R     | 1.70(1)   | 0.84(2)  |
| 3D2X | 1.38(73)  | —         | 3DVV     | 1.17(1)   | 0.82(2)  |
| 3Q3Z | 1.18(1)   | —         | 3S4P     | 0.79(3)   | 0.85(2)  |
| 3TD1 | 1.49(283) | 0.61(1)   | 3WRU     | 1.16(3)   | 1.42(1)  |
| 4F8U | 0.68(1)   | 0.71(8)   | 4F8V     | 1.69(4)   | 0.53(1)  |
| 4GPW | 1.14(10)  | 0.57(1)   | 4GPX     | 0.42(16)  | 1.29(1)  |
| 4GPY | 0.63(1)   | 1.13(18)  | 4K32     | 1.04(1)   | 1.14(14) |
| 4LVW | 0.88(19)  | 1.20(1)   | 4LVX     | 1.49(1)   | 1.62(13) |
| 4LVY | 0.68(6)   | 1.88(10)  | 4P20     | 1.02(1)   | 1.00(2)  |
| 4QK8 | 1.14(3)   | 0.71(1)   | 4QK9     | 0.83(1)   | 0.67(7)  |
| 4QKA | 1.37(2)   | 0.36(4)   | 4QLM     | 0.56(1)   | 1.21(99) |
| 4QLN | 0.87(3)   | —         | 4WCQ     | 0.53(151) | 0.75(2)  |
| 4YB0 | —         | 1.00(1)   | 5NDH     | 0.71(5)   | 1.88(2)  |
| PDB  | site 1    | site 2    | site 3   |           |          |
| 2ESI | 0.79(1)   | 1.76(2)   | —        |           |          |
| 2PWT | 0.57(2)   | 1.54(15)  | —        |           |          |
| PDB  | site 1    | site 2    | site 3   | site 4    |          |
| 1ZZ5 | 1.96(3)   | —         | 1.06(7)  | —         |          |
| 2A04 | 0.69(3)   |           | —        | 0.89(1)   |          |
| 2ET5 | 1.31(14)  | 0.88(1)   | 1.61(25) | 1.51(3)   |          |

<sup>a</sup> The number in the bracket is the ranked number of the success case.

Table S6: RMSD of the top-ranked pose for various docking models<sup>a</sup>

| PDB   | LigandRNA   | Drugscore <sup>RNA</sup> | DOCK6       | LigandRNA<br>+DOCK6 | rDOCK<br>(2004) | original<br>Drugscore <sup>RNA</sup> | MORDOR      | RLDOCK      |
|-------|-------------|--------------------------|-------------|---------------------|-----------------|--------------------------------------|-------------|-------------|
| 1AJU  | 2.30        | 5.60                     | 5.30        | 2.30                | —               | 7.32                                 | 4.51        | 13.46       |
| 1AM0  | 4.60        | 5.70                     | <b>1.40</b> | <b>1.70</b>         | <b>1.80</b>     | 2.86                                 | <b>0.85</b> | <b>0.88</b> |
| 1BYJ  | 6.80        | <b>2.00</b>              | 7.40        | 6.80                | <b>1.80</b>     | <b>1.99</b>                          | 5.37        | <b>1.57</b> |
| 1EHT  | 4.50        | 3.80                     | <b>0.30</b> | <b>1.40</b>         | 3.60            | <b>1.95</b>                          | <b>1.25</b> | 3.29        |
| 1EI2  | 6.90        | 6.90                     | 5.90        | 6.60                | —               | <b>0.84</b>                          | 3.23        | 3.44        |
| 1F1T  | <b>1.10</b> | <b>1.20</b>              | <b>1.20</b> | <b>1.20</b>         | —               | —                                    | <b>0.31</b> | <b>1.31</b> |
| 1F27  | 6.70        | <b>1.50</b>              | 6.90        | 7.00                | —               | 4.28                                 | <b>0.96</b> | <b>1.80</b> |
| 1FJG  | 6.30        | <b>0.30</b>              | <b>0.30</b> | <b>0.50</b>         | —               | —                                    | —           | —           |
| 1FMN  | 2.90        | 2.20                     | 2.90        | 2.90                | <b>0.80</b>     | <b>1.55</b>                          | <b>1.42</b> | 4.95        |
| 1FYP  | 5.10        | 5.10                     | 3.20        | <b>1.20</b>         | —               | <b>1.45</b>                          | 2.54        | <b>0.36</b> |
| 1HNV  | 8.30        | 5.00                     | 5.00        | 8.20                | —               | —                                    | —           | —           |
| 1J7T  | 8.60        | 2.60                     | <b>1.10</b> | 8.60                | —               | 3.80                                 | <b>1.05</b> | <b>1.53</b> |
| 1KOC  | 2.30        | 2.10                     | 2.60        | 2.20                | 2.70            | <b>1.61</b>                          | <b>1.62</b> | 9.01        |
| 1KOD  | <b>1.90</b> | 5.10                     | 5.30        | <b>2.00</b>         | 3.20            | <b>1.87</b>                          | <b>1.98</b> | 4.39        |
| 1MWL  | 6.80        | <b>0.70</b>              | 9.20        | 7.50                | —               | 9.00                                 | <b>1.00</b> | <b>0.68</b> |
| 1NBK  | 3.00        | <b>1.50</b>              | 2.60        | 2.10                | —               | 8.20                                 | 3.57        | 3.77        |
| 1NEM  | 9.30        | <b>1.10</b>              | <b>0.70</b> | <b>1.20</b>         | 8.70            | <b>0.66</b>                          | <b>0.95</b> | <b>0.76</b> |
| 1PBR  | 6.20        | 8.30                     | 8.50        | 8.90                | <b>1.80</b>     | <b>1.05</b>                          | <b>1.64</b> | <b>1.21</b> |
| 1Q8N  | <b>1.30</b> | <b>1.10</b>              | 7.70        | <b>2.00</b>         | —               | 3.65                                 | <b>1.90</b> | <b>0.56</b> |
| 1TOB  | 2.60        | 3.50                     | 4.80        | 2.30                | 9.80            | <b>1.52</b>                          | 2.63        | 5.20        |
| 1UTS  | 4.40        | 9.50                     | 4.20        | 9.70                | —               | 11.04                                | 4.90        | 10.58       |
| 1UUD  | 6.40        | 5.40                     | 5.40        | 5.40                | —               | <b>1.59</b>                          | 8.85        | 8.99        |
| 1UUI  | 5.60        | <b>1.50</b>              | <b>1.50</b> | <b>1.50</b>         | —               | 5.56                                 | 8.35        | 13.46       |
| 1XBP  | 8.10        | <b>1.80</b>              | 8.90        | 8.10                | —               | —                                    | —           | —           |
| 1XPF  | 3.40        | 6.60                     | 6.60        | 3.30                | —               | —                                    | 5.26        | 5.18        |
| 1Y26  | <b>0.50</b> | 30.50                    | <b>0.50</b> | <b>0.50</b>         | —               | —                                    | <b>0.54</b> | <b>1.07</b> |
| 2BE0  | 10.70       | 9.50                     | 3.50        | 10.70               | —               | —                                    | <b>1.97</b> | <b>0.82</b> |
| 2BEE  | 9.30        | 4.50                     | 9.30        | 9.20                | —               | —                                    | 2.01        | <b>0.80</b> |
| 2ET8  | <b>0.80</b> | 4.60                     | <b>0.70</b> | <b>0.80</b>         | —               | —                                    | <b>1.56</b> | <b>1.46</b> |
| 2F4U  | <b>1.00</b> | 3.00                     | <b>1.90</b> | <b>1.00</b>         | —               | —                                    | <b>2.00</b> | 9.0         |
| 2FCZ  | <b>0.60</b> | 7.20                     | <b>0.90</b> | <b>0.60</b>         | —               | —                                    | <b>1.74</b> | <b>0.71</b> |
| 2FD0  | 4.60        | 3.50                     | 3.50        | 4.60                | —               | —                                    | <b>0.95</b> | <b>1.17</b> |
| 2G5Q  | <b>0.70</b> | <b>0.50</b>              | <b>1.60</b> | <b>1.40</b>         | —               | —                                    | —           | <b>0.99</b> |
| 2GDI  | <b>1.80</b> | 2.10                     | 2.10        | 2.10                | —               | —                                    | —           | 25.94       |
| 2O3X  | <b>0.70</b> | 2.40                     | 2.10        | <b>0.80</b>         | —               | —                                    | —           | <b>1.35</b> |
| 2OE5  | <b>0.70</b> | 15.70                    | 5.60        | <b>0.70</b>         | —               | —                                    | <b>1.82</b> | 9.52        |
| 2OGN  | 8.60        | 2.10                     | 8.50        | 8.60                | —               | —                                    | —           | —           |
| 2PWT  | 7.60        | 4.30                     | 11.00       | 2.10                | —               | —                                    | —           | <b>0.57</b> |
| 2TOB  | <b>1.00</b> | <b>1.00</b>              | <b>1.50</b> | <b>1.50</b>         | <b>1.50</b>     | <b>1.45</b>                          | <b>0.85</b> | <b>1.02</b> |
| 3D2X  | <b>1.60</b> | 6.90                     | <b>1.90</b> | <b>1.90</b>         | —               | —                                    | —           | 20.35       |
| 3GX2  | <b>0.60</b> | 5.30                     | 4.70        | <b>0.70</b>         | —               | —                                    | —           | <b>1.20</b> |
| 3SUX  | <b>0.40</b> | <b>0.40</b>              | <b>0.50</b> | <b>0.40</b>         | —               | —                                    | —           | 34.63       |
| total | 15/42       | 13/42                    | 15/42       | 20/42               | 5/10            | 12/21                                | 20/31       | 21/38       |

<sup>a</sup> The data of other models are taken from the Ref. (7)



Table S7: The best RMSD in the three top-ranked poses for various docking models<sup>a</sup>

| PDB   | LigandRNA   | Drugscore <sup>RNA</sup> | ligandRNA   |             |             |
|-------|-------------|--------------------------|-------------|-------------|-------------|
|       |             |                          | DOCK6       | +DOCK6      | RLDOCK      |
| 1AJU  | 2.30        | 5.10                     | 4.90        | 2.30        | 13.31       |
| 1AM0  | 4.30        | 3.00                     | <b>1.20</b> | <b>1.40</b> | <b>0.88</b> |
| 1BYJ  | 6.70        | <b>1.80</b>              | <b>1.10</b> | 6.70        | <b>1.57</b> |
| 1EHT  | <b>1.40</b> | 3.80                     | <b>0.30</b> | <b>0.50</b> | <b>1.30</b> |
| 1EI2  | 6.60        | 6.70                     | 5.90        | 6.60        | 3.44        |
| 1FIT  | <b>1.10</b> | <b>1.10</b>              | <b>1.20</b> | <b>1.10</b> | <b>1.31</b> |
| 1F27  | 6.70        | <b>1.50</b>              | 6.90        | 6.70        | <b>1.72</b> |
| 1FJG  | <b>0.50</b> | <b>0.30</b>              | <b>0.30</b> | <b>0.50</b> | —           |
| 1FMN  | 2.90        | <b>2.00</b>              | 2.20        | 2.90        | 4.95        |
| 1FYP  | 5.00        | 5.10                     | 3.20        | <b>0.70</b> | <b>0.36</b> |
| 1HNW  | 8.20        | 5.00                     | 5.00        | 5.00        | —           |
| 1J7T  | 8.20        | <b>1.10</b>              | <b>1.10</b> | 8.20        | <b>1.35</b> |
| 1KOC  | <b>2.00</b> | 2.10                     | 2.60        | <b>1.90</b> | 3.93        |
| 1KOD  | <b>1.90</b> | 5.10                     | 5.30        | <b>2.00</b> | 2.24        |
| 1MWL  | 6.80        | <b>0.40</b>              | <b>0.40</b> | 6.80        | <b>0.68</b> |
| 1NBK  | 2.10        | <b>1.50</b>              | 2.50        | <b>1.50</b> | 3.77        |
| 1NEM  | 5.40        | <b>1.00</b>              | <b>0.70</b> | <b>1.10</b> | <b>0.76</b> |
| 1PBR  | 6.20        | <b>0.50</b>              | 8.50        | 6.20        | <b>1.21</b> |
| 1Q8N  | <b>1.30</b> | <b>1.10</b>              | 7.60        | <b>2.00</b> | <b>0.56</b> |
| 1TOB  | 2.20        | 3.50                     | 4.80        | 2.30        | 5.20        |
| 1UTS  | 4.40        | 8.10                     | 3.90        | 4.50        | 7.24        |
| 1UUD  | 3.40        | 5.40                     | 5.40        | 5.40        | 3.46        |
| 1UUI  | <b>1.40</b> | <b>1.50</b>              | <b>1.40</b> | <b>1.40</b> | 12.59       |
| 1XBP  | 6.90        | <b>1.70</b>              | 8.80        | 8.10        | —           |
| 1XPF  | 3.30        | 5.40                     | 6.50        | 3.30        | 5.18        |
| 1Y26  | <b>0.40</b> | 14.40                    | <b>0.40</b> | <b>0.40</b> | <b>1.07</b> |
| 2BE0  | 10.70       | 3.50                     | 3.50        | 10.70       | <b>0.82</b> |
| 2BEE  | 9.30        | 3.00                     | 9.30        | 9.20        | <b>0.80</b> |
| 2ET8  | <b>0.80</b> | 4.60                     | <b>0.70</b> | <b>0.70</b> | <b>1.46</b> |
| 2F4U  | <b>1.00</b> | 2.90                     | <b>1.90</b> | <b>1.00</b> | 5.37        |
| 2FCZ  | <b>0.60</b> | 4.80                     | <b>0.90</b> | <b>0.60</b> | <b>0.71</b> |
| 2FD0  | 4.60        | 3.50                     | 3.50        | 3.50        | <b>1.17</b> |
| 2G5Q  | <b>0.60</b> | <b>0.50</b>              | <b>1.60</b> | <b>0.60</b> | <b>0.99</b> |
| 2GDI  | <b>1.70</b> | 2.10                     | 2.10        | <b>1.90</b> | 22.35       |
| 2O3X  | <b>0.70</b> | <b>0.90</b>              | <b>1.70</b> | <b>0.70</b> | <b>1.35</b> |
| 2OE5  | <b>0.70</b> | 13.60                    | 5.60        | <b>0.70</b> | 9.52        |
| 2OGN  | 8.60        | <b>2.00</b>              | 7.90        | 8.60        | —           |
| 2PWT  | 7.60        | 3.40                     | 11.20       | 2.10        | <b>0.57</b> |
| 2TOB  | <b>1.00</b> | <b>1.00</b>              | <b>1.50</b> | <b>1.50</b> | <b>1.02</b> |
| 3D2X  | <b>1.60</b> | 2.30                     | <b>1.90</b> | <b>1.90</b> | 20.35       |
| 3GX2  | <b>0.60</b> | 5.30                     | <b>0.70</b> | <b>0.60</b> | <b>1.20</b> |
| 3SUX  | <b>0.40</b> | <b>0.40</b>              | <b>0.40</b> | <b>0.40</b> | 34.54       |
| total | 19/42       | 18/42                    | 18/42       | 23/42       | 23/38       |

<sup>a</sup> The data of other models are taken from the Ref. (7)

Table S8: AUC calculated from ROC

| PDB  | AUC  |
|------|------|------|------|------|------|------|------|------|------|------|------|------|------|
| 1AKX | 0.00 | 1AJU | 0.55 | 1UUD | 0.00 | 2GIS | 0.99 | 3GOT | 0.82 | 4AOB | 0.00 | 4QK9 | 0.81 |
| 1ET4 | 0.88 | 1AM0 | 1.00 | 1UUI | 0.00 | 2GQ5 | 0.00 | 3GX2 | 0.94 | 4B5R | 0.75 | 4QKA | 0.92 |
| 1F27 | 0.64 | 1ARJ | 0.00 | 1XPF | 0.00 | 2HOP | 0.59 | 3GX3 | 0.97 | 4ERL | 0.84 | 4QLM | 1.00 |
| 1J8G | 0.43 | 1BYJ | 0.82 | 1YKV | 0.85 | 2JUK | 0.00 | 3GX5 | 0.90 | 4F8U | 1.00 | 4QLN | 0.95 |
| 1KOC | 0.00 | 1DDY | 0.79 | 1YLS | 0.90 | 2KD4 | 0.92 | 3GX6 | 0.79 | 4F8V | 1.00 | 4RZD | 0.94 |
| 1LVJ | 1.00 | 1EHT | 0.89 | 1YRJ | 0.97 | 2KGP | 0.93 | 3GX7 | 0.68 | 4FE5 | 0.85 | 4TS0 | 0.96 |
| 1PBR | 0.93 | 1EI2 | 0.96 | 1ZZ5 | 0.96 | 2KU0 | 0.77 | 3IQN | 0.80 | 4FEL | 0.90 | 4TS2 | 0.97 |
| 1QD3 | 1.00 | 1EVV | 0.00 | 292D | 0.00 | 2KX8 | 0.42 | 3IQR | 0.97 | 4FEN | 0.82 | 4TZX | 0.89 |
| 1Y26 | 0.68 | 1F1T | 0.80 | 2A04 | 0.86 | 2KXM | 1.00 | 3IRW | 0.98 | 4FEP | 0.96 | 4TZY | 0.95 |
| 2BE0 | 0.89 | 1FMN | 0.84 | 2AU4 | 0.92 | 2L1V | 0.99 | 3K1V | 0.87 | 4FRG | 0.79 | 4WCQ | 0.82 |
| 2BEE | 0.76 | 1FUF | 0.00 | 2B57 | 0.70 | 2L8H | 0.94 | 3LA5 | 0.59 | 4GPW | 1.00 | 4WCR | 0.67 |
| 2ET4 | 1.00 | 1FYP | 0.58 | 2EES | 0.86 | 2MIY | 0.92 | 3NPN | 0.96 | 4GPX | 0.94 | 4XNR | 0.88 |
| 2F4T | 0.98 | 1I7J | 0.00 | 2EET | 0.80 | 2MXS | 0.77 | 3NPQ | 0.64 | 4GPY | 0.94 | 4YAZ | 0.99 |
| 2FD0 | 0.67 | 1I9V | 0.00 | 2EEU | 0.95 | 2N0J | 0.70 | 3OWI | 0.24 | 4JF2 | 0.97 | 4YB0 | 0.98 |
| 2KTZ | 0.77 | 1J7T | 1.00 | 2EEW | 0.83 | 2OE5 | 0.80 | 3OWZ | 0.14 | 4K32 | 1.00 | 4YB1 | 0.92 |
| 2O3X | 0.75 | 1KOD | 0.79 | 2ESI | 0.89 | 2OE8 | 0.71 | 3Q3Z | 0.88 | 4L81 | 0.75 | 4ZC7 | 0.79 |
| 2XO1 | 0.90 | 1LC4 | 0.99 | 2ESJ | 0.92 | 2PWT | 0.80 | 3Q50 | 0.92 | 4LVV | 0.90 | 5C7U | 0.73 |
| 3DIX | 0.49 | 1MWL | 0.59 | 2ET3 | 0.91 | 2QWY | 0.72 | 3RKF | 0.83 | 4LVX | 0.77 | 5C7W | 0.52 |
| 3FO4 | 0.84 | 1NBK | 0.60 | 2ET5 | 0.85 | 2TOB | 0.72 | 3S4P | 1.00 | 4LVY | 0.85 | 5NDH | 0.97 |
| 3GES | 0.92 | 1NEM | 0.98 | 2ET8 | 0.71 | 2W89 | 0.40 | 3SD3 | 0.92 | 4LVZ | 0.46 | 5NEF | 0.00 |
| 3SKL | 0.79 | 1NTA | 0.00 | 2F4S | 0.71 | 2XNW | 0.80 | 3SKI | 0.45 | 4LX5 | 0.80 |      |      |
| 3SUH | 1.00 | 1NTB | 0.59 | 2F4U | 0.89 | 2XNZ | 0.56 | 3SKR | 0.36 | 4LX6 | 0.82 |      |      |
| 3SUX | 0.68 | 1O15 | 0.28 | 2FCX | 0.71 | 2XO0 | 0.69 | 3SKT | 0.60 | 4NYA | 0.48 |      |      |
| 4FEJ | 0.74 | 1O9M | 0.98 | 2FCY | 0.74 | 2YDH | 0.68 | 3SKW | 0.59 | 4NYC | 0.62 |      |      |
| 4FEO | 0.82 | 1Q8N | 0.75 | 2FCZ | 1.00 | 2YIE | 0.71 | 3SKZ | 0.84 | 4NYD | 0.92 |      |      |
| 4KQY | 0.98 | 1RAW | 0.88 | 2G5K | 0.96 | 3B4B | 0.56 | 3SLM | 0.94 | 4NYG | 0.00 |      |      |
| 4LVW | 0.60 | 1TN1 | 0.33 | 2G5Q | 0.77 | 3B4C | 0.41 | 3SLQ | 0.81 | 4OQU | 0.70 |      |      |
| 4LW0 | 0.81 | 1TN2 | 0.30 | 2G9C | 0.92 | 3C3Z | 1.00 | 3TD1 | 1.00 | 4P20 | 0.84 |      |      |
| 4NYB | 0.85 | 1TOB | 0.44 | 2GCV | 0.00 | 3C44 | 1.00 | 3TZR | 0.81 | 4PDQ | 0.78 |      |      |
| 5C45 | 0.66 | 1UTS | 0.80 | 2GDI | 0.00 | 3C5D | 0.99 | 3WRU | 0.80 | 4QK8 | 0.96 |      |      |
